# Supplementary material for: Perspective on high-temperature surface oxygen exchange in a porous mixed ionic-electronic conductor for solid oxide cells
Source: Royal Society of Chemistry journal article supplement (doi:10.1039/d3cp00375b), 2023-01-01
Supplement: d3cp00375b1.pdf [file d3cp00375b1.pdf]

*Supplementary information*

**Perspective on high-temperature surface oxygen exchange in porous  
mix-conducting ceramic for solid oxide cell**

Hairui Han,<sup>a</sup> Yunan Jiang<sup>\*a,b</sup> Shaowei Zhang and Changrong Xia<sup>\*a,b</sup>

- a. CAS Key Laboratory of Materials for Energy Conversion, Department of Materials Science and Engineering, University of Science and Technology of China, No. 96 Jinzhai Road, Hefei, Anhui Province, 230026, P. R. China.  
E-mail: xiacr@ustc.edu.cn.
- b. Energy materials center, Anhui Estone Materials Technology Co. Ltd, 2-A-1, No.106, Chuangxin Avenue, Hefei, Anhui Province, 230088, P.R. China

Table S1 Calculation-based parameters for equations 17-21

| Parameter                                                                                                                      | value                 |
|--------------------------------------------------------------------------------------------------------------------------------|-----------------------|
| the difference in lattice oxygen concentration between the initial and the final state ( $c_0 - c_e$ ) (mol cm <sup>-3</sup> ) | 304*                  |
| pore radius (r) (m)                                                                                                            | 3E-08                 |
| porosity ( $\epsilon$ )                                                                                                        | 0.45                  |
| sample thickness (L) (m)                                                                                                       | 1.67E-04              |
| tortuosity ( $\bar{\tau}$ )                                                                                                    | 2                     |
| gaseous oxygen viscosity ( $\eta$ ) (Pa s)                                                                                     | 1E-06                 |
| current density (i) (A m <sup>-2</sup> )                                                                                       | 20000                 |
| Knudsen diffusion coefficient ( $D_{O_2,k}$ ) (m <sup>2</sup> s <sup>-1</sup> )                                                | 8.88E-06 <sup>#</sup> |
| self-diffusion coefficient ( $D_{O_2,s}$ ) (m <sup>2</sup> s <sup>-1</sup> )                                                   | 2.19E-04 <sup>#</sup> |

\* Assuming the difference in lattice oxygen concentration between the initial and final states is independent of temperature.

# The Knudsen diffusion and self-diffusion coefficients are calculated at 800 °C.

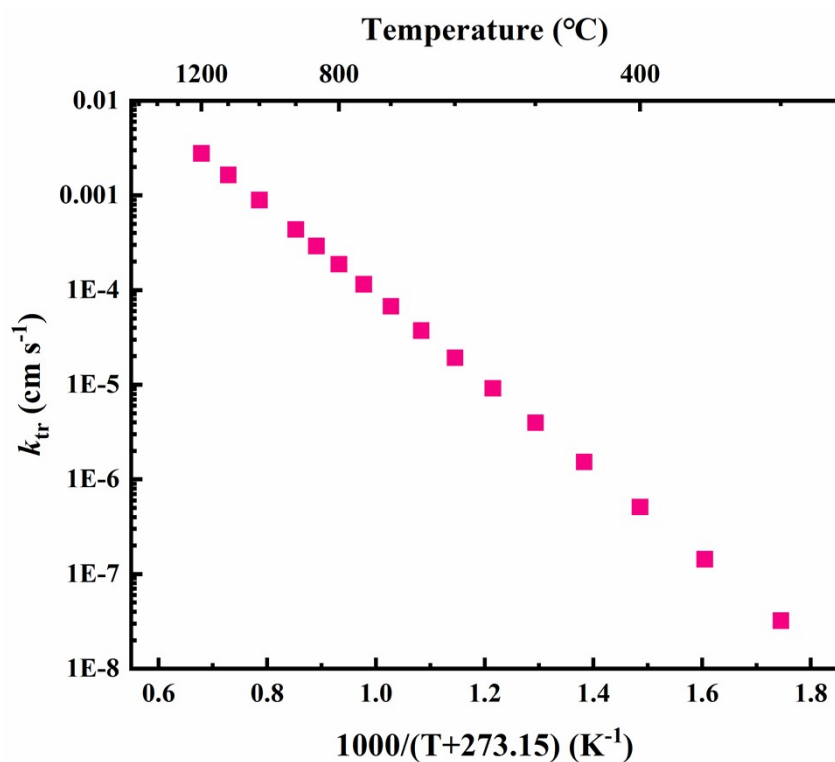

Fig. S1 Dependence of temperature on trace surface exchange coefficient ( $k_{tr}$ ) of Ba<sub>0.5</sub>Sr<sub>0.5</sub>Co<sub>0.8</sub>Fe<sub>0.2</sub>O<sub>3-δ</sub>. Data collected from ref 30.
